# Supplementary material for: Synthesis, optical and electrochemical properties of (D–π)2-type and (D–π)2Ph-type fluorescent dyes
Source: publisher site journal article supplement (doi:10.3762/bjoc.18.106), 2022-08-18
Supplement: Additional file 1 [file 1860-5397-18-106-S1.pdf]

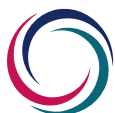

## Supporting Information

for

### Synthesis, optical and electrochemical properties of (D- $\pi$ )<sub>2</sub>-type and (D- $\pi$ )<sub>2</sub>Ph-type fluorescent dyes

Kosuke Takemura, Kazuki Ohira, Taiki Higashino, Keiichi Imato and Yousuke Ooyama

*Beilstein J. Org. Chem.* **2022**, *18*, 1047–1054. [doi:10.3762/bjoc.18.106](https://doi.org/10.3762/bjoc.18.106)

### <sup>1</sup>H and <sup>13</sup>C NMR spectra of OTT-2

(a)

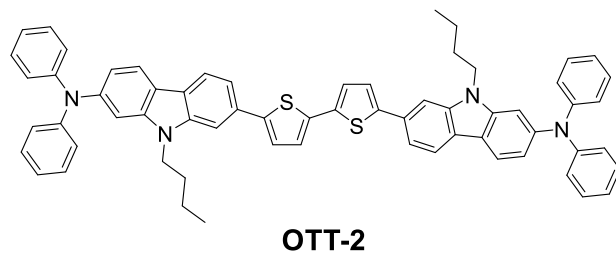

**OTT-2**

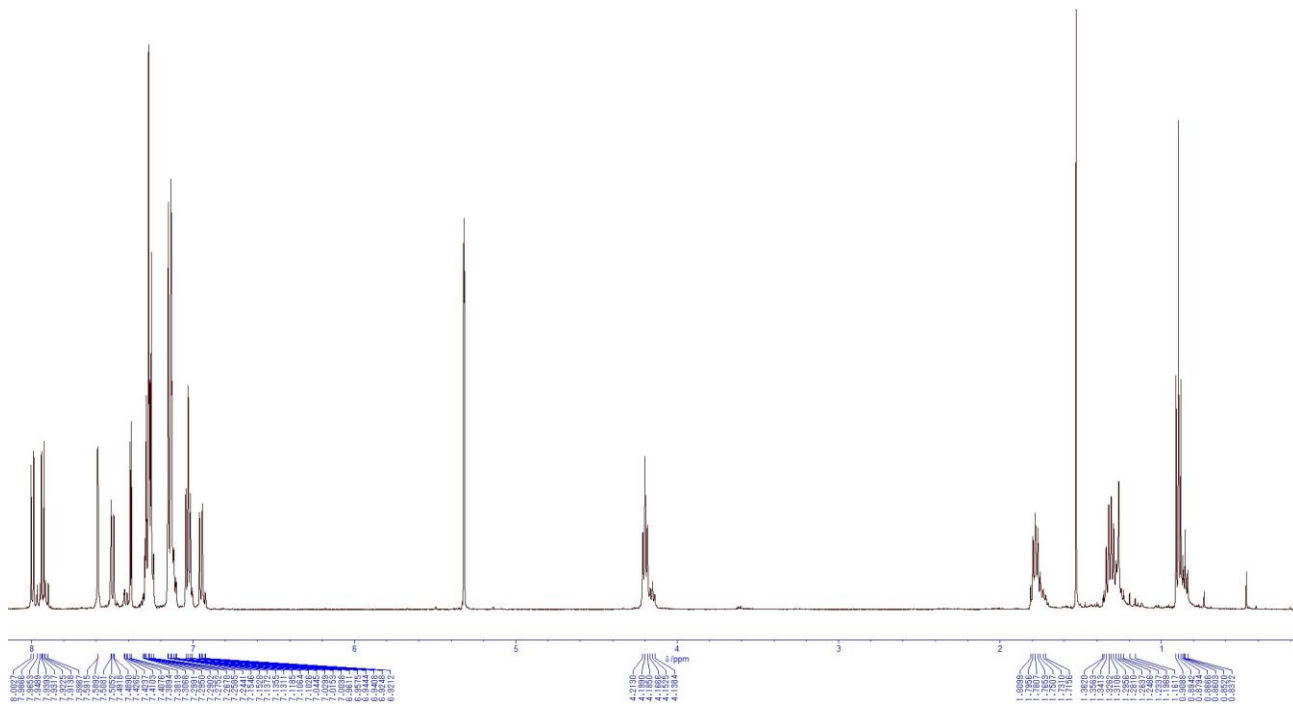

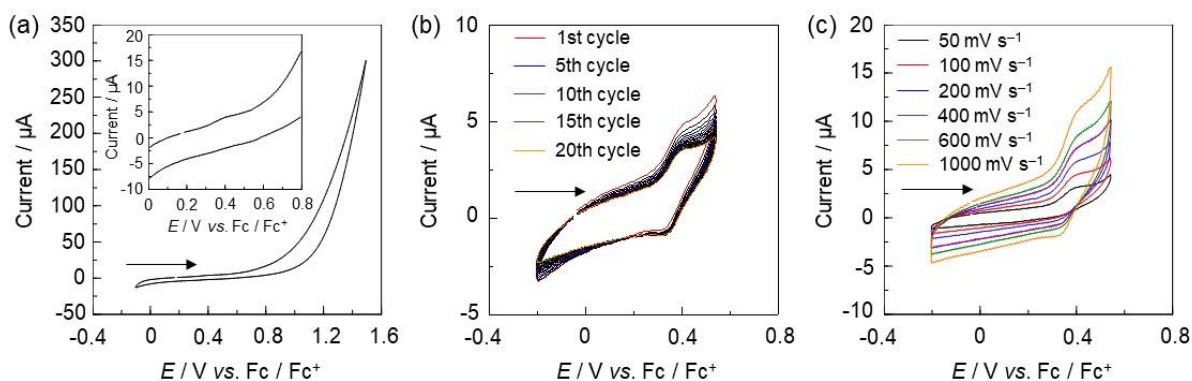

**Figure S2:** Cyclic voltammograms of **OTK-2** (0.1 mM) in DMF containing 0.1 M  $\text{Bu}_4\text{NClO}_4$  (a) at a scan rate of  $100 \text{ mV s}^{-1}$  in a broader potential range ( $-0.2$  to  $1.5 \text{ V}$ ), (b) by the repeated potential cycling (20th scan) at a scan rate of  $100 \text{ mV s}^{-1}$  and (c) at different scan rates ( $50$ ,  $100$ ,  $200$ ,  $400$ ,  $600$  and  $1000 \text{ mV s}^{-1}$ ). The arrow denotes the direction of the potential scan. The inset in (a) is magnification of potential range from  $0$  to  $0.8 \text{ V}$ .

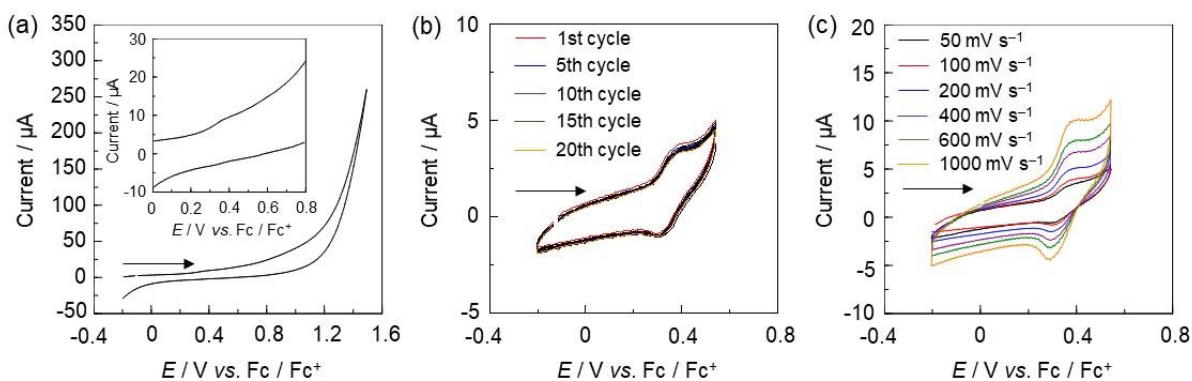

**Figure S3:** Cyclic voltammograms of **OTT-2** (0.1 mM) in DMF containing 0.1 M  $\text{Bu}_4\text{NClO}_4$  (a) at a scan rate of  $100 \text{ mV s}^{-1}$  in a broader potential range ( $-0.2$  to  $1.5 \text{ V}$ ), (b) by the repeated potential cycling (20th scan) at a scan rate of  $100 \text{ mV s}^{-1}$  and (c) at different scan rates ( $50$ ,  $100$ ,  $200$ ,  $400$ ,  $600$  and  $1000 \text{ mV s}^{-1}$ ). The arrow denotes the direction of the potential scan. The inset in (a) is magnification of potential range from  $0$  to  $0.8 \text{ V}$ .
